# Supplementary material for: Early Diagnosis of Pneumonia in Severe Stroke: Clinical Features and the Diagnostic Role of C-Reactive Protein
Source: PubMed Central journal article supplement (PMC4777448; doi:10.1371/journal.pone.0150269), 2016-03-03
Supplement: pone.0150269.s001.pdf [file pone.0150269.s001.pdf]

## **Supplemental Data**





















## Keys

|  |                           |
|--|---------------------------|
|  | Onset of pneumonia        |
|  | onset of other infections |

**2nd pneumonia episode in patient no 17 and 18 and the 1st pneumonia episode in patient no 47 were excluded in analysis as detailed in manuscript.**
