# Supplementary material for: Early Diagnosis of Pneumonia in Severe Stroke: Clinical Features and the Diagnostic Role of C-Reactive Protein
Source: PubMed Central journal article supplement (PMC4777448; doi:10.1371/journal.pone.0150269), 2016-03-03
Supplement: pone.0150269.s002.pdf [file pone.0150269.s002.pdf]

**S1 Table. Contingency Data**

| Test result          |          | Diagnosis |          |
|----------------------|----------|-----------|----------|
|                      |          | positive  | negative |
| For CRP $\geq$ 25.60 | positive | 28        | 9        |
|                      | negative | 5         | 18       |
| For CRP $\geq$ 64.65 | positive | 21        | 2        |
|                      | negative | 12        | 25       |

CRP – C-reactive protein
